# Supplementary material for: Development and Validation of Questionnaires Exploring Health Care Professionals' Intention to Use Wiki-Based Reminders to Promote Best Practices in Trauma
Source: PubMed Central journal article supplement (PMC4213801; doi:10.2196/resprot.3762), 2014-10-03
Supplement: resprot_v3i3e50_app1.pdf [file resprot_v3i3e50_app1.pdf]

## ***Multimedia Appendix 1:***

Links to YouTube™ videos presenting the behavior studied (in French)

Video for physicians: <https://www.youtube.com/watch?v=kKCHdm0P8Mg&list=FLGpK694I5Rpw2VRro-yVabQ&index=4>

Video for registered nurses: <https://www.youtube.com/watch?v=ybHtadfHJJ4&index=3&list=FLGpK694I5Rpw2VRro-yVabQ>

Video for respiratory therapists: <https://www.youtube.com/watch?v=Z1jmePKwd18&index=2&list=FLGpK694I5Rpw2VRro-yVabQ>

Video for pharmacists: <https://www.youtube.com/watch?v=dt2AknU5nFo&list=FLGpK694I5Rpw2VRro-yVabQ&index=1>
