# Supplementary material for: Development and Validation of Questionnaires Exploring Health Care Professionals' Intention to Use Wiki-Based Reminders to Promote Best Practices in Trauma
Source: PubMed Central journal article supplement (PMC4213801; doi:10.2196/resprot.3762), 2014-10-03
Supplement: resprot_v3i3e50_app11.pdf [file resprot_v3i3e50_app11.pdf]

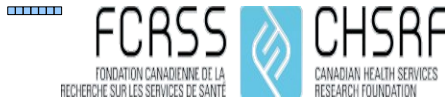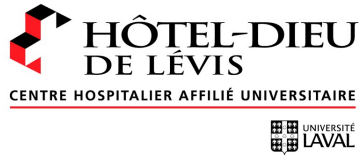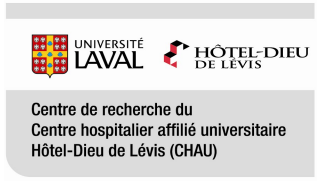

# STUDY ON WIKI USE

## QUESTIONNAIRE

**WIKI PROJECT (B)**

Date : \_\_\_\_\_  
dd/mm/yyyy



1. This questionnaire is about the use of wiki-based reminders that promote best practice in the management of severe cranial trauma in emergency rooms in the province of Quebec.
2. Although some of the questions may seem repetitive, it is very important that you answer them all anyway.
3. Your choice of answers should best reflect your opinion or your situation.
4. There are no right and wrong answers.
5. Your answers will remain confidential.
6. The questionnaire should take about 10 minutes.

**Your participation in this survey is voluntary and your data will remain confidential. Returning the completed questionnaire will be considered an expression of your consent to participate in the project. For any comments or questions about this research project please contact Susie Gagnon, Research Professional, at 418-835-7121 ext. 6267.**

### **Consent:**

I understand that the data collected by this questionnaire will be anonymous. I understand that it will be treated with confidentiality and in no circumstances will be associated with my institution when the results are made public. I have noted the above information and I freely consent to participate in this study. I understand that I may stop answering the questionnaire at any moment without prejudice.

- Yes
- No

**Before you begin, please watch the following video depending on your profession:**

[Nurses' video](#)

[Respiratory Therapists' video](#)

[Pharmacists' video](#)

### **Definition of a wiki**

- A wiki is a website programmed to allow anyone who has access to it to edit (change) its content. It is thus a collaborative work tool, and could contain treatment protocols, for example, or decision algorithms. In the healthcare context, a wiki could enable doctors and



Very difficult

Very easy

5. **If I used a wiki-based reminder** that promotes best practice for managing severe cranial trauma in emergency rooms in the province of Quebec, most of the people who are important to me would:

1 2 3 4 5 6 7  
Strongly disagree Strongly agree

6. **I intend to use a wiki-based reminder** that promotes best practice for managing severe cranial trauma in emergency rooms in the province of Quebec.

1 2 3 4 5 6 7  
Strongly disagree Strongly agree

7. **The people who are most important to me think I should use a wiki-based reminder** that promotes best practice for managing severe cranial trauma in emergency rooms in the province of Quebec.

1 2 3 4 5 6 7  
Strongly disagree Strongly agree

8. **I estimate the odds of my using a wiki-based reminder** that promotes best practice for managing severe cranial trauma in emergency rooms in the province of Quebec to be:

1 2 3 4 5 6 7  
Very low Very high

9. **In the future I will use a wiki-based reminder** that promotes best practice for managing severe cranial trauma in emergency rooms in the province of Quebec.

1 2 3 4 5 6 7  
Very unlikely Very likely

10. **For me, using a wiki-based reminder** that promotes best practice for managing severe cranial trauma in emergency rooms in the province of Quebec would be:

*[tick one box in each of these 4 scales]*

1 2 3 4 5 6 7  
Very unpleasant Very pleasant

1 2 3 4 5 6 7  
Very stressful Very relaxing

1 2 3 4 5 6 7  
Totally useless Very useful

1 2 3 4 5 6 7  
Very unsatisfying Very satisfying

Please use this scale to answer the question that follows.

|                          |   |   |   |   |   |                       |
|--------------------------|---|---|---|---|---|-----------------------|
| 1                        | 2 | 3 | 4 | 5 | 6 | 7                     |
| <b>Strongly disagree</b> |   |   |   |   |   | <b>Strongly agree</b> |

11. The following people would **approve** of **my use of a wiki-based reminder** that promotes best practice for managing severe cranial trauma in emergency rooms in the province of Quebec:

The **doctors** at my hospital

|   |   |   |   |   |   |   |
|---|---|---|---|---|---|---|
| 1 | 2 | 3 | 4 | 5 | 6 | 7 |
|---|---|---|---|---|---|---|

The **respiratory therapists** at my hospital

|   |   |   |   |   |   |   |
|---|---|---|---|---|---|---|
| 1 | 2 | 3 | 4 | 5 | 6 | 7 |
|---|---|---|---|---|---|---|

The **nurses** at my hospital

|   |   |   |   |   |   |   |
|---|---|---|---|---|---|---|
| 1 | 2 | 3 | 4 | 5 | 6 | 7 |
|---|---|---|---|---|---|---|

The **hospital staff in regional/remote hospitals who are less exposed to severe cranial trauma**

|   |   |   |   |   |   |   |
|---|---|---|---|---|---|---|
| 1 | 2 | 3 | 4 | 5 | 6 | 7 |
|---|---|---|---|---|---|---|

The **younger generation of staff** at my hospital

|   |   |   |   |   |   |   |
|---|---|---|---|---|---|---|
| 1 | 2 | 3 | 4 | 5 | 6 | 7 |
|---|---|---|---|---|---|---|

People at my hospital **who are not used to computers**

|   |   |   |   |   |   |   |
|---|---|---|---|---|---|---|
| 1 | 2 | 3 | 4 | 5 | 6 | 7 |
|---|---|---|---|---|---|---|

The **trauma team** at my hospital

|   |   |   |   |   |   |   |
|---|---|---|---|---|---|---|
| 1 | 2 | 3 | 4 | 5 | 6 | 7 |
|---|---|---|---|---|---|---|

The **people responsible for quality of care** at my hospital

|   |   |   |   |   |   |   |
|---|---|---|---|---|---|---|
| 1 | 2 | 3 | 4 | 5 | 6 | 7 |
|---|---|---|---|---|---|---|

The **administration** at my hospital

|   |   |   |   |   |   |   |
|---|---|---|---|---|---|---|
| 1 | 2 | 3 | 4 | 5 | 6 | 7 |
|---|---|---|---|---|---|---|

My **patients**

|   |   |   |   |   |   |   |
|---|---|---|---|---|---|---|
| 1 | 2 | 3 | 4 | 5 | 6 | 7 |
|---|---|---|---|---|---|---|

12. **It would be easier for me to use a wiki-based reminder** that promotes best practice for managing severe cranial trauma in emergency rooms in the province of Quebec:  
[Tick **one box** for **each** of the 7 statements below]

|                                                                         | Strongly disagree | More or less disagree | Slightly disagree | Neither agree or disagree | Slightly agree | More or less agree | Strongly agree |
|-------------------------------------------------------------------------|-------------------|-----------------------|-------------------|---------------------------|----------------|--------------------|----------------|
| a) if the computer was available at the patient's bedside.              |                   |                       |                   |                           |                |                    |                |
| b) if the scientific quality had been validated.                        |                   |                       |                   |                           |                |                    |                |
| c) if I could try it out before using it.                               |                   |                       |                   |                           |                |                    |                |
| d) if it was simple to use (e.g. navigation, searching for information) |                   |                       |                   |                           |                |                    |                |
| e) if it was a secure site.                                             |                   |                       |                   |                           |                |                    |                |
| f) if there was a workstation for each profession.                      |                   |                       |                   |                           |                |                    |                |
| g) if it was well designed.                                             |                   |                       |                   |                           |                |                    |                |



13. **I would feel capable of using a wiki-based reminder** that promotes best practice for managing severe cranial trauma in emergency rooms in the province of Quebec:  
[Tick **one box** for **each** of the 5 statements below]

|                                                                                                    | Strongly disagree | More or less disagree | Slightly disagree | Neither agree or disagree | Slightly agree | More or less agree | Strongly agree |
|----------------------------------------------------------------------------------------------------|-------------------|-----------------------|-------------------|---------------------------|----------------|--------------------|----------------|
| a) <b>even if</b> I didn't know who was legally responsible.                                       |                   |                       |                   |                           |                |                    |                |
| b) <b>even if</b> I had time constraints.                                                          |                   |                       |                   |                           |                |                    |                |
| c) <b>even if</b> the computer system wasn't always reliable.                                      |                   |                       |                   |                           |                |                    |                |
| d) <b>even if</b> not everyone in the team was up to speed with the latest version of the reminder |                   |                       |                   |                           |                |                    |                |
| e) <b>even if</b> its use was obligatory.                                                          |                   |                       |                   |                           |                |                    |                |

14. **If I used** a wiki-based reminder that promotes best practice for managing severe cranial trauma in emergency rooms in the province of Quebec, it would:  
 [Tick **one box** for **each** of the 8 statements below]

|                                                          | Strongly disagree | More or less disagree | Slightly disagree | Neither agree or disagree | Slightly agree | More or less agree | Strongly agree |
|----------------------------------------------------------|-------------------|-----------------------|-------------------|---------------------------|----------------|--------------------|----------------|
| a) <b>speed up access to reminders.</b>                  |                   |                       |                   |                           |                |                    |                |
| b) <b>improve the quality of care that I provide.</b>    |                   |                       |                   |                           |                |                    |                |
| c) give me <b>reminders that were regularly updated.</b> |                   |                       |                   |                           |                |                    |                |
| d) <b>standardize practices.</b>                         |                   |                       |                   |                           |                |                    |                |
| e) <b>promote team work.</b>                             |                   |                       |                   |                           |                |                    |                |
| f) <b>centralize information and protocols.</b>          |                   |                       |                   |                           |                |                    |                |
| g) give me <b>access to evidence</b>                     |                   |                       |                   |                           |                |                    |                |
| h) be useful as a <b>teaching tool.</b>                  |                   |                       |                   |                           |                |                    |                |

**Sociodemographic information**

15. How old are you? \_\_\_\_\_

16. What sex are you?

Woman

Man

17. What is your profession?

Nurse

Respiratory Therapist

Pharmacist

Other \_\_\_\_\_

18. What hospital do you work in? \_\_\_\_\_
19. How many years have you been practising your profession (after interning)?
20. a) Is there a computer with internet access in your emergency room?
- Yes
- No
21. Do you currently use a wiki in your professional life (e.g. Wikipedia)
- Yes → Which one and how often? \_\_\_\_\_
- No
22. Do you currently use a wiki in your personal life?
- Yes → Which one and how often? \_\_\_\_\_
- No
23. Have you ever edited a wiki (made changes to the website)?
- Yes → Which one? \_\_\_\_\_
- No
24. Are you a member of a traumatology committee (local or regional)?
- Yes
- No

**The questionnaire is over!**

**Please make sure you have answered all the questions.**

**THANK YOU FOR YOUR COLLABORATION**

**If you have any comments or suggestions regarding this questionnaire  
or this study please write them here:**
