# Supplementary material for: Development and Validation of Questionnaires Exploring Health Care Professionals' Intention to Use Wiki-Based Reminders to Promote Best Practices in Trauma
Source: PubMed Central journal article supplement (PMC4213801; doi:10.2196/resprot.3762), 2014-10-03
Supplement: resprot_v3i3e50_app12.pdf [file resprot_v3i3e50_app12.pdf]

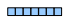

**FCRSS**  
FONDATION CANADIENNE DE LA  
RECHERCHE SUR LES SERVICES DE SANTÉ

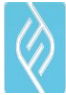

**CHSRF**  
CANADIAN HEALTH SERVICES  
RESEARCH FOUNDATION

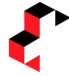

**HÔTEL-DIEU  
DE LÉVIS**

CENTRE HOSPITALIER AFFILIÉ UNIVERSITAIRE

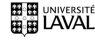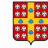

UNIVERSITÉ  
LAVAL

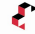

HÔTEL-DIEU  
DE LÉVIS

Centre de recherche du  
Centre hospitalier affilié universitaire  
Hôtel-Dieu de Lévis (CHAU)

## **STUDY ON WIKI USE**

### ***PHYSICIAN QUESTIONNAIRE***

## **WIKI PROJECT (A)**

**Date:** \_\_\_\_\_  
dd/mm/yyyy

1. This questionnaire is about the use of wiki-based reminders that promote best practice in the management of severe cranial trauma in emergency rooms in the province of Quebec.
2. Although some of the questions may seem repetitive, it is very important that you answer them all anyway.
3. Your choice of answers should best reflect your opinion or your situation.
4. There are no right and wrong answers.
5. Your answers will remain confidential.
6. The questionnaire should take about 10 minutes.

**Your participation in this survey is voluntary and your data will remain confidential. Returning the completed questionnaire will be considered an expression of your consent to participate in the project.**

**For any comments or questions about this research project please contact Susie Gagnon, Research Professional, at 418-835-7121 ext. 6267.**

**Consent:**

I understand that the data collected by this questionnaire will be anonymous. I understand that it will be treated with confidentiality and in no circumstances will be associated with my institution when the results are made public. I have noted the above information and I freely consent to participate in this study. I understand that I may stop answering the questionnaire at any moment without prejudice.

Yes

No

**Before you begin, please watch [this video](#).**

**Definition of a wiki:**

- A wiki is a website programmed to allow anyone who has access to it to edit (change) its content. It is thus a collaborative work tool, and could contain treatment protocols, for example, or decision algorithms. In the healthcare context, a wiki could enable doctors and other professionals to share, update and edit reminders based on the most recent evidence. Healthcare professionals who had access to a wiki in their hospital could consult it directly in their workplace.
- For example, in the case of a severe cranial trauma, a wiki-based reminder could be brought up online on a computer and the team could use the information in their response.

**This questionnaire seeks your opinion on the possible use of a wiki-based reminder that promotes best practices in managing severe cranial trauma in emergency rooms in the province of Quebec.**

1. **I would feel capable of using a wiki-based reminder** that promotes best practice for managing severe cranial trauma in emergency rooms in the province of Quebec.

1                      2                      3                      4                      5                      6                      7

Strongly disagree

Strongly agree

2. **If I wanted to, I feel confident that I could use a wiki-based reminder** that promotes best practice for managing severe cranial trauma in emergency rooms in the province of Quebec.

1                      2                      3                      4                      5                      6                      7

Strongly disagree

Strongly agree

3. **I feel social pressure to use a wiki-based reminder** that promotes best practice for managing severe cranial trauma in emergency rooms in the province of Quebec.

1                      2                      3                      4                      5                      6                      7

Strongly disagree

Strongly agree

4. **For me to use a wiki-based reminder** that promotes best practice for managing severe cranial trauma in emergency rooms in the province of Quebec would be:

1                      2                      3                      4                      5                      6                      7

Very difficult

Very easy

5. **I am expected to use a wiki-based reminder** that promotes best practice for managing severe cranial trauma in emergency rooms in the province of Quebec.

1                      2                      3                      4                      5                      6                      7

Strongly disagree

Strongly agree

6. **I intend to use a wiki-based reminder** that promotes best practice for managing severe cranial trauma in emergency rooms in the province of Quebec.

1                      2                      3                      4                      5                      6                      7

Strongly disagree

Strongly agree

7. **The people who are most important to me think I should use a wiki-based reminder** that promotes best practice for managing severe cranial trauma in emergency rooms in the province of Quebec.

|                          |   |   |   |   |   |                       |
|--------------------------|---|---|---|---|---|-----------------------|
| 1                        | 2 | 3 | 4 | 5 | 6 | 7                     |
| <b>Strongly disagree</b> |   |   |   |   |   | <b>Strongly agree</b> |

8. **I estimate the odds of my using a wiki-based reminder** that promotes best practice for managing severe cranial trauma in emergency rooms in the province of Quebec to be:

|                 |   |   |   |   |   |                  |
|-----------------|---|---|---|---|---|------------------|
| 1               | 2 | 3 | 4 | 5 | 6 | 7                |
| <b>Very low</b> |   |   |   |   |   | <b>Very high</b> |

9. **I will use a wiki-based reminder** that promotes best practice for managing severe cranial trauma in emergency rooms in the province of Quebec.

|                      |   |   |   |   |   |                    |
|----------------------|---|---|---|---|---|--------------------|
| 1                    | 2 | 3 | 4 | 5 | 6 | 7                  |
| <b>Very unlikely</b> |   |   |   |   |   | <b>Very likely</b> |

10. **For me, using a wiki-based reminder** that promotes best practice for managing severe cranial trauma in emergency rooms in the province of Quebec would be:  
*(tick one box in each of these three scales)*

|                        |   |   |   |   |   |                      |
|------------------------|---|---|---|---|---|----------------------|
| 1                      | 2 | 3 | 4 | 5 | 6 | 7                    |
| <b>Very unpleasant</b> |   |   |   |   |   | <b>Very pleasant</b> |

|                        |   |   |   |   |   |                    |
|------------------------|---|---|---|---|---|--------------------|
| 1                      | 2 | 3 | 4 | 5 | 6 | 7                  |
| <b>Totally useless</b> |   |   |   |   |   | <b>Very useful</b> |

|                          |   |   |   |   |   |                        |
|--------------------------|---|---|---|---|---|------------------------|
| 1                        | 2 | 3 | 4 | 5 | 6 | 7                      |
| <b>Very unsatisfying</b> |   |   |   |   |   | <b>Very satisfying</b> |

**Please use this scale to answer the question that follows.**

|                          |   |   |   |   |   |                       |
|--------------------------|---|---|---|---|---|-----------------------|
| 1                        | 2 | 3 | 4 | 5 | 6 | 7                     |
| <b>Strongly disagree</b> |   |   |   |   |   | <b>Strongly agree</b> |



12. The following people would **disapprove** of **my use of a wiki-based reminder** that promotes best practice for managing severe cranial trauma in emergency rooms in the province of Quebec would be disapproved of by

People who are **opposed to the standardized care** offered at my hospital

**1                    2                    3                    4                    5                    6                    7**

People at my hospital **who are not used to computers**

**1                    2                    3                    4                    5                    6                    7**

13. **I would feel capable of using a wiki-based reminder** that promotes best practice for managing severe cranial trauma in emergency rooms in the province of Quebec:

[Tick **one box** for **each** of the 9 statements below]

| Strongly disagree | More or less disagree | Slightly disagree | Neither agree or disagree | Slightly agree | More or less agree | Strongly agree |
|-------------------|-----------------------|-------------------|---------------------------|----------------|--------------------|----------------|
|-------------------|-----------------------|-------------------|---------------------------|----------------|--------------------|----------------|

a) **if** it was simple to use.

b) **if** a computer was available at the patient's bedside

c) **if** the information had been validated by a peer review committee.

d) **if** access to the reminder was quick.

e) **if** the institutional did not control access (e.g. passwords, blocked sites).

f) **if** it was properly integrated into my work activities.

g) **if** it was accessible via my mobile device (e.g. iPod, iPhone, iPad, Blackberry).

j) **if** my hospital had internet access.

k) **if** the site was well designed.



14. **I would feel capable of using a wiki-based reminder** that promotes best practice for managing severe cranial trauma in emergency rooms in the province of Quebec:

[Tick **one box** for **each** of the 5 statements below]

|                                                              | Strongly disagree | More or less disagree | Slightly disagree | Neither agree or disagree | Slightly agree | More or less agree | Strongly agree |
|--------------------------------------------------------------|-------------------|-----------------------|-------------------|---------------------------|----------------|--------------------|----------------|
| a) <b>even if</b> the information wasn't regularly updated.  |                   |                       |                   |                           |                |                    |                |
| b) <b>even if</b> I had very little time.                    |                   |                       |                   |                           |                |                    |                |
| c) <b>even if</b> the information changed often.             |                   |                       |                   |                           |                |                    |                |
| d) <b>even if</b> the authors were not identified.           |                   |                       |                   |                           |                |                    |                |
| e) <b>even if</b> I didn't know who was legally responsible. |                   |                       |                   |                           |                |                    |                |

15. If I used a **wiki-based reminder** that promotes best practice for managing severe cranial trauma in emergency rooms in the province of Quebec, it would:

[Tick **one box** for **each** of the 8 statements below]

|                                                        | Strongly disagree | More or less disagree | Slightly disagree | Neither agree or disagree | Slightly agree | More or less agree | Strongly agree |
|--------------------------------------------------------|-------------------|-----------------------|-------------------|---------------------------|----------------|--------------------|----------------|
| a) enable me to refresh my memory.                     |                   |                       |                   |                           |                |                    |                |
| b) give me access to evidence-based information.       |                   |                       |                   |                           |                |                    |                |
| c) enable sharing of information with other hospitals. |                   |                       |                   |                           |                |                    |                |
| d) standardize practices.                              |                   |                       |                   |                           |                |                    |                |
| e) centralize information and protocols.               |                   |                       |                   |                           |                |                    |                |
| f) reduce intervention errors.                         |                   |                       |                   |                           |                |                    |                |
| g) give me access to expert opinion.                   |                   |                       |                   |                           |                |                    |                |
| h) reduce my stress level.                             |                   |                       |                   |                           |                |                    |                |

### Sociodemographic information

16. How old are you? \_\_\_\_\_

17. What sex are you?

F  M

18. Do you have a certificate in emergency medicine?

Yes  →  College of Family Physicians of Canada  
 Royal College of Physicians and Surgeons of \_\_\_\_\_

No  → My specialty is \_\_\_\_\_

19. What hospital do you work in? \_\_\_\_\_
20. How many years have you worked in emergency (since your residency)? \_\_\_\_\_
21. Is there a computer with internet access in your emergency room?  
Yes  No
22. Do you currently use a wiki in your professional life (e.g. Wikipedia)  
 Yes → Which one? \_\_\_\_\_ How often? \_\_\_\_\_  
 No
23. Do you currently use a wiki in your personal life?  
 Yes → Which one? \_\_\_\_\_ How often? \_\_\_\_\_  
 No
24. Have you ever edited a wiki (made changes to the website)?  
 Yes → Which one? \_\_\_\_\_ How often? \_\_\_\_\_  
 No
25. Are you a member of a traumatology committee (local or regional)?  
 Yes  
 No

**The questionnaire is over!**  
**Please make sure you have answered all the questions.**  
**THANK YOU FOR YOUR COLLABORATION**

**If you have any comments or suggestions regarding this questionnaire  
or this study please write them here:**
