# Supplementary material for: Development and Validation of Questionnaires Exploring Health Care Professionals' Intention to Use Wiki-Based Reminders to Promote Best Practices in Trauma
Source: JMIR Res Protoc. 2014 Oct 3;3(4):e50. doi: 10.2196/resprot.3762 (PMC4213801; doi:10.2196/resprot.3762)
Supplement: Supplementary file 7 [file resprot_v3i3e50_app7.pdf]

## Multimedia Appendix 7: Changes made to the EP questionnaire after the 2 week test-retest

| Before                                                                                                                                                                                                                                                                                                                                                                                                                                                                  | After                                                                                                                                                                                                                                                                                                                                                                                                                    |
|-------------------------------------------------------------------------------------------------------------------------------------------------------------------------------------------------------------------------------------------------------------------------------------------------------------------------------------------------------------------------------------------------------------------------------------------------------------------------|--------------------------------------------------------------------------------------------------------------------------------------------------------------------------------------------------------------------------------------------------------------------------------------------------------------------------------------------------------------------------------------------------------------------------|
| <b>Je ne vois pas d'obstacle à utiliser</b> un aide-mémoire basé dans un wiki qui promeut une pratique exemplaire pour la prise en charge des traumatisés crâniens sévères dans les salles d'urgence du Québec.                                                                                                                                                                                                                                                         | <b>Si je le voulais, je suis confiant que je pourrais utiliser un aide-mémoire basé dans un wiki</b> qui promeut une pratique exemplaire pour la prise en charge des traumatisés crâniens sévères dans les salles d'urgence du Québec.                                                                                                                                                                                   |
| <b>Mon utilisation</b> d'un aide-mémoire basé dans un wiki qui promeut une pratique exemplaire pour la prise en charge des traumatisés crâniens sévères dans les salles d'urgence du Québec <b>serait approuvée par :</b><br><br><p>Les <b>personnes qui s'opposent aux soins standardisés approuveraient</b> de mon centre hospitalier</p> <p>Les <b>personnes moins à l'aise avec l'informatique</b> de mon centre hospitalier</p>                                    | <b>Mon utilisation d'un aide-mémoire basé dans un wiki</b> qui promeut une pratique exemplaire pour la prise en charge des traumatisés crâniens sévères dans les salles d'urgence du Québec <b>serait désapprouvée par :</b><br><br><p>Les <b>personnes qui s'opposent aux soins standardisés</b> de mon centre hospitalier</p> <p>Les <b>personnes moins à l'aise avec l'informatique</b> de mon centre hospitalier</p> |
| <b>Il serait plus facile pour moi</b> d'utiliser un aide-mémoire basé dans un wiki qui promeut la meilleure pratique de prise en charge des traumatisés crâniens sévères au département d'urgence au Québec...<br><br><p>a) <b>s'il</b> était simple à utiliser (e.g., la navigation et la recherche d'information)</p> <p>c) <b>si</b> la qualité scientifique de l'information était validée</p> <p>f) <b>s'il</b> était compatible avec mon processus de travail</p> | <b>Je me sentirais capable d'utiliser un aide-mémoire basé dans un wiki</b> qui promeut la meilleure pratique de prise en charge des traumatisés crâniens sévères au département d'urgence au Québec...<br><br><p>a) <b>s'il</b> était simple à utiliser.</p> <p>c) <b>si</b> l'information était validée par un comité de pairs.</p> <p>f) <b>s'il</b> était bien intégré dans les activités de mon travail.</p>        |

|                                                                                                                                                                                                                                                                                                                                       |                                                                                                         |
|---------------------------------------------------------------------------------------------------------------------------------------------------------------------------------------------------------------------------------------------------------------------------------------------------------------------------------------|---------------------------------------------------------------------------------------------------------|
| <p>h) <b>s'il</b> était facile de l'adapter à la réalité de mon milieu de travail.</p> <p>i) <b>si</b> je pouvais l'expérimenter avant de l'utiliser.</p>                                                                                                                                                                             | <p>SUPPRIMER</p> <p>SUPPRIMER</p>                                                                       |
| <p>Je me <b>sentirais capable</b> d'utiliser un aide-mémoire basé dans un wiki qui promeut la meilleure pratique de prise en charge des traumatisés crâniens sévères au département d'urgence au Québec...</p> <p>b) même si <b>j'avais des contraintes de temps</b></p> <p>c) même si <b>l'information changeait fréquemment</b></p> | <p>b) <u>même si</u> j'avais peu de temps.</p> <p>c) <u>même si</u> l'information changeait souvent</p> |
| <p><b>Si j'utilisais</b> un aide-mémoire basé dans un wiki qui promeut la meilleure pratique de prise en charge des traumatisés crâniens sévères au département d'urgence au Québec, cela...</p> <p>h) <b>augmenterait</b> mon niveau de stress</p>                                                                                   | <p>h) <b>diminuerait</b> mon niveau de stress</p>                                                       |
