# Supplementary material for: Development and Validation of Questionnaires Exploring Health Care Professionals' Intention to Use Wiki-Based Reminders to Promote Best Practices in Trauma
Source: JMIR Res Protoc. 2014 Oct 3;3(4):e50. doi: 10.2196/resprot.3762 (PMC4213801; doi:10.2196/resprot.3762)
Supplement: Supplementary file 10 [file resprot_v3i3e50_app10.pdf]

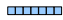

**FCRSS**  
FONDATION CANADIENNE DE LA  
RECHERCHE SUR LES SERVICES DE SANTÉ

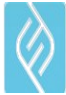

**CHSRF**  
CANADIAN HEALTH SERVICES  
RESEARCH FOUNDATION

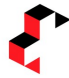

**HÔTEL-DIEU  
DE LÉVIS**

CENTRE HOSPITALIER AFFILIÉ UNIVERSITAIRE

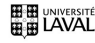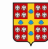

UNIVERSITÉ  
**LAVAL**

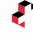

**HÔTEL-DIEU  
DE LÉVIS**

Centre de recherche du  
Centre hospitalier affilié universitaire  
Hôtel-Dieu de Lévis (CHAU)

# ÉTUDE SUR L'UTILISATION DU WIKI

## *QUESTIONNAIRE DU MÉDECIN*

***PROJET WIKI (A)***

Date : \_\_\_\_\_  
jj/mm/aaaa

1. Ce questionnaire porte sur votre utilisation d'un aide-mémoire basé dans un wiki qui promeut une pratique exemplaire pour la prise en charge des traumatisés crâniens sévères dans les salles d'urgence du Québec.
2. Bien que certaines questions puissent vous sembler répétitives, il est très important de répondre à toutes les questions.
3. Pour répondre aux questions, vous devez inscrire votre réponse à l'endroit reflétant le mieux votre opinion ou votre situation.
4. Notez qu'il n'y a ni bonne ni mauvaise réponse.
5. Vos réponses demeureront confidentielles.
6. Le temps requis pour répondre au questionnaire est d'environ 10 minutes.

**La participation à ce sondage est volontaire et vos données resteront confidentielles. Le simple fait d'acheminer le questionnaire rempli sera considéré comme l'expression de votre consentement à participer au projet.**

**Pour tout commentaire ou question concernant ce projet de recherche veuillez communiquer avec Susie Gagnon, professionnelle de recherche, au 418-835-7121 poste 6267.**

### **Consentement:**

1. Je comprends que les données de ce questionnaire sont anonymes. Je comprends que les données seront traitées de façon confidentielle et, qu'en aucun cas, elles ne seront associées à mon établissement lors de la diffusion des résultats. Après avoir pris connaissance des informations ci-dessus, j'accepte librement de participer à cette étude et j'ai bien compris que je peux arrêter de répondre au questionnaire n'importe quand, sans préjudice.

Oui

☐

☐ Non

**Avant de débiter, il faut regarder la vidéo suivante : [cliquez ici](#)**

**Voici la définition d'un wiki :**

- Un wiki est un site Web programmé pour permettre l'édition par toute personne y ayant accès. Il est donc un outil de travail collaboratif et contient par exemple des protocoles de soins et des algorithmes de décision. Plus concrètement, dans le monde de la santé, un wiki pourrait permettre aux médecins et autres professionnels de partager, mettre à jour et éditer des aide-mémoire selon les dernières données probantes. Une fois implanté dans un centre hospitalier, il permettrait à tous les professionnels de la santé y ayant accès de le consulter directement sur leurs lieux de travail.
- Par exemple, dans le cas d'un traumatisme crânien sévère, l'aide-mémoire basé dans un wiki pourra être trouvé sur le web à partir d'un ordinateur et ainsi l'équipe pourra l'utiliser pour intervenir.

**Ce questionnaire porte sur votre opinion concernant l'utilisation potentielle d'un aide-mémoire basé dans un wiki faisant la promotion des pratiques exemplaires de prise en charge des traumatisés crâniens sévères dans les salles d'urgence du Québec.**

2. **Je me sentirais capable d'utiliser un aide-mémoire basé dans un wiki** qui promeut une pratique exemplaire pour la prise en charge des traumatisés crâniens sévères dans les salles d'urgence du Québec.

|                   |   |   |   |   |   |                |
|-------------------|---|---|---|---|---|----------------|
| 1                 | 2 | 3 | 4 | 5 | 6 | 7              |
| Très en désaccord |   |   |   |   |   | Très en accord |

3. **Si je le voulais, je suis confiant que je pourrais utiliser un aide-mémoire basé dans un wiki** qui promeut une pratique exemplaire pour la prise en charge des traumatisés crâniens sévères dans les salles d'urgence du Québec.

|                   |   |   |   |   |   |                |
|-------------------|---|---|---|---|---|----------------|
| 1                 | 2 | 3 | 4 | 5 | 6 | 7              |
| Très en désaccord |   |   |   |   |   | Très en accord |

4. **Je ressens une pression sociale à utiliser un aide-mémoire basé dans un wiki** qui promeut une pratique exemplaire pour la prise en charge des traumatisés crâniens sévères dans les salles d'urgence du Québec.

|                   |   |   |   |   |   |                |
|-------------------|---|---|---|---|---|----------------|
| 1                 | 2 | 3 | 4 | 5 | 6 | 7              |
| Très en désaccord |   |   |   |   |   | Très en accord |

5. **Pour moi, utiliser un aide-mémoire basé dans un wiki** qui promeut une pratique exemplaire pour la prise en charge des traumatisés crâniens sévères dans les salles d'urgence du Québec serait...

|                |   |   |   |   |   |             |
|----------------|---|---|---|---|---|-------------|
| 1              | 2 | 3 | 4 | 5 | 6 | 7           |
| Très difficile |   |   |   |   |   | Très facile |

6. **Il est attendu de moi d'utiliser un aide-mémoire basé dans un wiki** qui promeut une pratique exemplaire pour la prise en charge des traumatisés crâniens sévères dans les salles d'urgence du Québec.

|                   |   |   |   |   |   |                |
|-------------------|---|---|---|---|---|----------------|
| 1                 | 2 | 3 | 4 | 5 | 6 | 7              |
| Très en désaccord |   |   |   |   |   | Très en accord |

7. **J'ai l'intention d'utiliser un aide-mémoire basé dans un wiki** qui promeut une pratique exemplaire pour la prise en charge des traumatisés crâniens sévères dans les salles d'urgence du Québec.

|                   |   |   |   |   |   |                |
|-------------------|---|---|---|---|---|----------------|
| 1                 | 2 | 3 | 4 | 5 | 6 | 7              |
| Très en désaccord |   |   |   |   |   | Très en accord |

8. **Les personnes les plus importantes pour moi pensent que je devrais utiliser un aide-mémoire basé dans un wiki** qui promeut une pratique exemplaire pour la prise en charge des traumatisés crâniens sévères dans les salles d'urgence du Québec.

|                   |   |   |   |   |   |                |
|-------------------|---|---|---|---|---|----------------|
| 1                 | 2 | 3 | 4 | 5 | 6 | 7              |
| Très en désaccord |   |   |   |   |   | Très en accord |

9. **J'évalue mes chances d'utiliser un aide-mémoire basé dans un wiki** qui promeut une pratique exemplaire pour la prise en charge des traumatisés crâniens sévères dans les salles d'urgence du Québec comme étant :

|              |   |   |   |   |   |              |
|--------------|---|---|---|---|---|--------------|
| 1            | 2 | 3 | 4 | 5 | 6 | 7            |
| Très faibles |   |   |   |   |   | Très grandes |

10. **Je vais utiliser un aide-mémoire basé dans un wiki** qui promeut une pratique exemplaire pour la prise en charge des traumatisés crâniens sévères dans les salles d'urgence du Québec.

|                 |   |   |   |   |   |               |
|-----------------|---|---|---|---|---|---------------|
| 1               | 2 | 3 | 4 | 5 | 6 | 7             |
| Très improbable |   |   |   |   |   | Très probable |

11. **Pour moi, utiliser un aide-mémoire basé dans un wiki** qui promeut une pratique exemplaire pour la prise en charge des traumatisés crâniens sévères dans les salles d'urgence du Québec serait...

*[Cochez la case appropriée pour chacun des trois énoncés suivants]*

|                  |   |   |   |   |   |               |
|------------------|---|---|---|---|---|---------------|
| 1                | 2 | 3 | 4 | 5 | 6 | 7             |
| Très désagréable |   |   |   |   |   | Très agréable |

|              |   |   |   |   |   |            |
|--------------|---|---|---|---|---|------------|
| 1            | 2 | 3 | 4 | 5 | 6 | 7          |
| Très inutile |   |   |   |   |   | Très utile |

|                     |   |   |   |   |   |                   |
|---------------------|---|---|---|---|---|-------------------|
| 1                   | 2 | 3 | 4 | 5 | 6 | 7                 |
| Très insatisfaisant |   |   |   |   |   | Très satisfaisant |

Afin de répondre au groupe de questions suivant, s.v.p. veuillez-vous référer à l'échelle de réponse suivante :

|                   |   |   |   |   |   |                |
|-------------------|---|---|---|---|---|----------------|
| 1                 | 2 | 3 | 4 | 5 | 6 | 7              |
| Très en désaccord |   |   |   |   |   | Très en accord |

12. **Mon utilisation d'un aide-mémoire basé dans un wiki** qui promeut une pratique exemplaire pour la prise en charge des traumatisés crâniens sévères dans les salles d'urgence du Québec serait approuvée par :

Le **personnel infirmier** de mon centre hospitalier

1 2 3 4 5 6 7

Les **médecins** de mon centre hospitalier :

1 2 3 4 5 6 7

Le **personnel hospitalier des centres éloignés, moins exposés aux traumatisés crâniens sévères**

1 2 3 4 5 6 7

La **génération plus jeune d'employés** de mon centre hospitalier

1 2 3 4 5 6 7

Les **inhalothérapeutes** de mon centre hospitalier

1 2 3 4 5 6 7

L'**équipe de traumatologie** de mon centre hospitalier

1 2 3 4 5 6 7

L'**administration** de mon centre hospitalier

1 2 3 4 5 6 7

Mes **patients**

1 2 3 4 5 6 7

Les **médecins spécialistes (intensivistes, chirurgiens)** de mon centre hospitalier

1 2 3 4 5 6 7

Afin de répondre au groupe de questions suivant, s.v.p. veuillez-vous référer à l'échelle de réponse suivante :

1 2 3 4 5 6 7

Très en désaccord

Très en accord

**13. Mon utilisation d'un aide-mémoire basé dans un wiki** qui promeut une pratique exemplaire pour la prise en charge des traumatisés crâniens sévères dans les salles d'urgence du Québec **serait désapprouvée par :**

Les **personnes qui s'opposent aux soins standardisés** de mon centre hospitalier

|          |          |          |          |          |          |          |
|----------|----------|----------|----------|----------|----------|----------|
| <b>1</b> | <b>2</b> | <b>3</b> | <b>4</b> | <b>5</b> | <b>6</b> | <b>7</b> |
|----------|----------|----------|----------|----------|----------|----------|

Les **personnes moins à l'aise avec l'informatique** de mon centre hospitalier

|          |          |          |          |          |          |          |
|----------|----------|----------|----------|----------|----------|----------|
| <b>1</b> | <b>2</b> | <b>3</b> | <b>4</b> | <b>5</b> | <b>6</b> | <b>7</b> |
|----------|----------|----------|----------|----------|----------|----------|

13. **Je me sentirais capable d'utiliser un aide-mémoire basé dans un wiki** qui promeut la meilleure pratique de prise en charge des traumatisés crâniens sévères au département d'urgence au Québec,... [Cochez la case appropriée pour ***chacun des neuf énoncés suivants***]

|                                                                                                            | Très en désaccord | Assez en désaccord | Légèrement en désaccord | Ni en désaccord ni en accord | Légèrement en accord | Assez en accord | Très en accord |
|------------------------------------------------------------------------------------------------------------|-------------------|--------------------|-------------------------|------------------------------|----------------------|-----------------|----------------|
| a) <b>s'il</b> était simple à utiliser .                                                                   |                   |                    |                         |                              |                      |                 |                |
| b) <b>si</b> un ordinateur était accessible au chevet du patient.                                          |                   |                    |                         |                              |                      |                 |                |
| c) <b>si</b> l'information était validée par un comité de pairs.                                           |                   |                    |                         |                              |                      |                 |                |
| d) <b>si</b> l'accès à l'aide-mémoire était rapide.                                                        |                   |                    |                         |                              |                      |                 |                |
| e) <b>s'il</b> n'y avait pas de contrôle institutionnel sur l'accès (p.ex., mots de passe, sites bloqués). |                   |                    |                         |                              |                      |                 |                |
| f) <b>s'il</b> était bien intégré dans les activités de mon travail.                                       |                   |                    |                         |                              |                      |                 |                |
| g) <b>s'il</b> était accessible par appareil mobile (p.ex., iPod, iPhone, iPad, Blackberry).               |                   |                    |                         |                              |                      |                 |                |
| j) <b>s'il</b> y avait un accès Internet à mon centre hospitalier.                                         |                   |                    |                         |                              |                      |                 |                |
| k) <b>s'il</b> avait une conception visuelle de qualité.                                                   |                   |                    |                         |                              |                      |                 |                |

14. **Je me sentirais capable d'utiliser un aide-mémoire basé dans un wiki** qui promeut la meilleure pratique de prise en charge des traumatisés crâniens sévères au département d'urgence au Québec...

[Cochez la case appropriée pour **chacun des cinq énoncés suivants**]

|                                                                              | Très en<br>désaccord | Assez en<br>désaccord | Légèrement<br>en<br>désaccord | Ni en<br>désaccord<br>ni en<br>accord | Légèrement<br>en accord | Assez en<br>accord | Très en<br>accord |
|------------------------------------------------------------------------------|----------------------|-----------------------|-------------------------------|---------------------------------------|-------------------------|--------------------|-------------------|
| a) <b>même si</b> l'information<br>n'était pas mise à jour<br>régulièrement. |                      |                       |                               |                                       |                         |                    |                   |
| b) <b>même si</b> j'avais peu de<br>temps.                                   |                      |                       |                               |                                       |                         |                    |                   |
| c) <b>même si</b> l'information<br>changeait souvent                         |                      |                       |                               |                                       |                         |                    |                   |
| d) <b>même si</b> les auteurs<br>n'étaient pas identifiés.                   |                      |                       |                               |                                       |                         |                    |                   |
| e) <b>même si</b> j'ignorais qui<br>détient la responsabilité<br>légale.     |                      |                       |                               |                                       |                         |                    |                   |

15. Si j'utilisais un aide-mémoire basé dans un wiki qui promeut la meilleure pratique de prise en charge des traumatisés crâniens sévères au département d'urgence au Québec, cela...

[Cochez la case appropriée pour **chacun des huit énoncés suivants**]

|                                                                             | Très en désaccord | Assez en désaccord | Légèrement en désaccord | Ni en désaccord ni en accord | Légèrement en accord | Assez en accord | Très en accord |
|-----------------------------------------------------------------------------|-------------------|--------------------|-------------------------|------------------------------|----------------------|-----------------|----------------|
| a) me permettrait de me rafraîchir la mémoire.                              |                   |                    |                         |                              |                      |                 |                |
| b) me donnerait accès aux données probantes.                                |                   |                    |                         |                              |                      |                 |                |
| c) permettrait le partage d'information avec d'autres centres hospitaliers. |                   |                    |                         |                              |                      |                 |                |
| d) uniformiserait les pratiques.                                            |                   |                    |                         |                              |                      |                 |                |
| e) centraliserait l'information et les protocoles.                          |                   |                    |                         |                              |                      |                 |                |
| f) réduirait les erreurs au niveau des interventions.                       |                   |                    |                         |                              |                      |                 |                |
| g) permettrait d'avoir l'opinion des experts.                               |                   |                    |                         |                              |                      |                 |                |
| h) diminuerait mon niveau de stress.                                        |                   |                    |                         |                              |                      |                 |                |

### Données sociodémographiques

16. Quel âge avez-vous? \_\_\_\_\_ ans

17. Quel est votre sexe?

F ☐ H ☐

18. Avez-vous une certification en médecine d'urgence?

Oui ☐ → ☐ Collège des médecins de famille du Canada ?  
☐ Collège royal des médecins et chirurgiens du ?

Non ☐ → Spécifiez votre spécialité \_\_\_\_\_

19. Dans quel centre hospitalier travaillez-vous? \_\_\_\_\_
20. Depuis combien d'années exercez-vous à l'urgence (après la résidence) ? \_\_\_\_\_
21. Y a-t-il un ordinateur avec accès à Internet dans votre salle d'urgence?  
Oui ☐ Non ☐
22. Utilisez-vous actuellement un wiki pour un usage professionnel (p.ex., Wikipédia)?  
☐ Oui → Lequel?: \_\_\_\_\_ A quelle fréquence?: \_\_\_\_\_  
☐ Non
23. Utilisez-vous actuellement un wiki pour un usage personnel (p.ex., Wikipédia)?  
☐ Oui → Lequel?: \_\_\_\_\_ A quelle fréquence?: \_\_\_\_\_  
☐ Non
24. Avez-vous édité, par le passé, un wiki?  
☐ Oui → Lequel?: \_\_\_\_\_ A quelle fréquence?: \_\_\_\_\_  
☐ Non
25. Êtes-vous membre d'un comité de traumatologie (local ou régional)?  
☐ Oui  
☐ Non

**Le questionnaire est terminé!**  
**S'il vous plaît, assurez-vous d'avoir répondu à toutes les questions.**

**MERCI DE VOTRE PRÉCIEUSE COLLABORATION**

**Si vous avez des commentaires ou suggestions concernant ce questionnaire  
ou cette recherche, veuillez les inscrire ci-dessous.**
